# Supplementary material for: Ordered mesoporous carbon with binary CoFe atomic species for highly efficient oxygen reduction electrocatalysis
Source: Royal Society of Chemistry journal article supplement (doi:10.1039/d4nr00175c), 2024-01-01
Supplement: d4nr00175c1.pdf [file d4nr00175c1.pdf]

## Supporting Information

### **Ordered mesoporous carbon with binary CoFe atomic species for highly efficient oxygen reduction electrocatalysis**

Fengying Pan,<sup>‡,a</sup> Ziyang Shen,<sup>‡,a</sup> Xianjun Cao,<sup>a</sup> Yuxia Zhang,<sup>b</sup> Cheng Gong,<sup>a</sup> Jinhu Wu,<sup>a</sup>  
Jinqiang Zhang,<sup>\*,c</sup> Hao Liu,<sup>\*,c</sup> Xiaowei Li<sup>\*,d</sup> and Yufei Zhao<sup>\*,a,c</sup>

<sup>a</sup> Joint International Laboratory on Environmental and Energy Frontier Materials,  
School of Environmental and Chemical Engineering, Shanghai University, Shanghai  
200444, P. R. China

<sup>b</sup> School of Materials Science and Engineering, Shijiazhuang Tiedao University,  
Shijiazhuang 050043, P. R. China

<sup>c</sup> Centre for Clean Energy Technology, Faculty of Science, University of Technology  
Sydney, Broadway, Sydney, NSW 2007, Australia

<sup>d</sup> School of Environmental and Chemical Engineering, Organic Compound Pollution  
Control Engineering, Ministry of Education, Shanghai University, Shanghai 200444,  
People R. China

## Section S1. Experimental Section

### 1.1 Chemicals and Materials

All chemicals were used as received without further purification. Tetraethyl orthosilicate (TEOS) and P-123 (PEG-PPG-PEG) were obtained from Sigma-Aldrich Co., Ltd. hydrochloric acid (HCl) was purchased from Sinopharm Chemical Reagents Co., Ltd. Cobalt nitrate hexahydrate ( $\text{Co}(\text{NO}_3)_2 \cdot 6\text{H}_2\text{O}$ ), ferric nitrate nonahydrate ( $\text{Fe}(\text{NO}_3)_3 \cdot 9\text{H}_2\text{O}$ ), 2-Methylimidazole, sodium hydroxide (NaOH), potassium hydroxide (KOH) and Methyl alcohol (MeOH) were received from Shanghai Titan Chemical Co., Ltd.

### 1.2 Materials Preparations

**Preparation of CoFe/NC-750.** CoFe/NC-750 was obtained by using SBA-15 as hard template. Typically, SBA-15 (0.2000 g) was added to a clear solution formed by 2-methylimidazole (0.2497 g) and MeOH (30 mL), and the mixture was stirred at 80 °C until all the MeOH evaporated. Subsequently,  $\text{Co}(\text{NO}_3)_2 \cdot 6\text{H}_2\text{O}$  (0.2166 g) and  $\text{Fe}(\text{NO}_3)_3 \cdot 9\text{H}_2\text{O}$  (0.1009 g) were dissolved in 30 mL MeOH, added to the above solid solution, and stirred at 80 °C until all the MeOH evaporated. Afterwards, the collected sample was pyrolyzed under Ar atmosphere at 750 °C for 2 h. Repeating the above steps three times to ensure that CoFe-MOF grows on the surface and pores of SBA-15 and is carbonized by subsequent pyrolysis. Then the SBA-15 template and exposed metal particles were removed by 2 M NaOH and 0.5 M  $\text{H}_2\text{SO}_4$  hot solution, respectively. The final product was achieved after another annealing at the same conditions at 750 °C.

**Preparation of Co/NC-750 and Fe/NC -750.** Co/NC and Fe/NC catalysts were prepared by similar method to CoFe/NC without adding  $\text{Fe}(\text{NO}_3)_3 \cdot 9\text{H}_2\text{O}$  or  $\text{Co}(\text{NO}_3)_2 \cdot 6\text{H}_2\text{O}$ , respectively.

**Preparation of CoFe/NC-T.** CoFe/NC-T (T= 700 °C, 800 °C, 850 °C) catalysts were fabricated with similar procedure to CoFe/NC-750, but at different carbonization temperature.

### 1.3 Material Characterizations

Scanning electron microscope (SEM, JSM-7500F), transmission electron microscopy (TEM, JEM-2100F) and high-angle annular dark-field scanning transmission electron microscopy (HAADF-STEM, JEM-ARM300F) were used to investigate morphologies, structures and compositions of samples. X-ray diffraction (XRD) patterns were taken on a D/MAX2200V PC (Cu  $K\alpha$  ( $\lambda$ = 0.15406 nm), 40 kV, 40 mA). Raman spectra was recorded on a Renishaw inVia Qontor. X-ray photoelectron spectroscopy (XPS) patterns were carried out on a Thermo Scientific K-Alpha.  $\text{N}_2$  adsorption-desorption isotherms were obtained on an ASAP 2460 equipment. Inductively coupled plasma-mass spectrometry (ICP-MS) were collected on a Aglient 7800.

### 1.4 Electrochemical Measurements

The ORR performance evaluation of catalysts was conducted on a PINE electrochemical instrumentation (Pine AFCBP1) with a standard three-electrode setup. The catalysts were dropped on rotating disk electrode (RDE) (GC, 5 nm in diameter) acting as the working electrode, Hg/HgO electrode and carbon rod were used as the

reference electrode and the counter electrode, respectively. Catalysts (1 mg) and Nafion solution (5  $\mu\text{L}$ , 5 wt.%) were added into ethanol (250  $\mu\text{L}$ ) and the obtained mixture was ultrasonically treated for 30 min to form a homogeneous ink. After that, 15  $\mu\text{L}$  catalytic ink was loaded onto the RDE with a loading area of 300  $\mu\text{g cm}^{-2}$ . The ORR performances were evaluated in  $\text{O}_2$ -saturated 1 M KOH solution at a scan rate of 10  $\text{mV s}^{-1}$  by linear sweep voltammograms (LSV). All of potentials are referenced to the reverse hydrogen electrode (RHE) with the calibration equation:  $E_{(\text{RHE})} = E_{(\text{Hg}/\text{HgO})} + 0.059 \times \text{pH} + 0.098$ . The electron transfer numbers ( $n$ ) and the yield of peroxide ( $\text{H}_2\text{O}_2\%$ ) of the catalysts were investigated by the rotating ring-disk electrode (RRDE) experiment at a sweep rate of 10  $\text{mV s}^{-1}$  with rotating speeds ranging from 400 to 2025 rpm.

The kinetic current ( $j_K$ ) was calculated according to the Koutecky-Levich equation (1) and (2). For RRDE measurement,  $n$  and  $\text{H}_2\text{O}_2\%$  were calculated as the following equation (3) and (4).

$$\frac{1}{j} = \frac{1}{j_L} + \frac{1}{j_K} = \frac{1}{B\omega^{2/3}} + \frac{1}{j_K} \quad (1)$$

$$B = 0.62nFC_{\text{O}_2}D_0^{2/3}\gamma^{1/6} \quad (2)$$

$$n = 4 \times \frac{I_d}{I_r + \frac{I_r}{N}} \quad (3)$$

$$\text{H}_2\text{O}_2\% = 200 \times \frac{\frac{I_r}{N}}{I_d + \frac{I_r}{N}} \quad (4)$$

In these equations,  $j$  is the measured current density,  $j_L$  and  $j_K$  represent the diffusion-limiting current density and kinetic-limiting current density, respectively.  $\omega$  is the angular velocity of electrode.  $n$  is the transferred electron number.  $F$  is the Faraday constant ( $= 96485 \text{ C mol}^{-1}$ ).  $Co_2$  is the bulk  $O_2$  concentration in 0.1 M KOH solution ( $1.2 \times 10^{-3} \text{ mol/L}$ ).  $D_0$  is the diffusion coefficient of  $O_2$  in electrolyte ( $1.9 \times 10^{-5} \text{ cm}^2/\text{s}$ ) and  $\nu$  is the kinematic viscosity of the electrolyte ( $0.01 \text{ cm}^2/\text{s}$ ).  $I_d$  and  $I_r$  represent the disk current and the ring current, respectively, and  $N$  is the current collection efficiency of the Pt ring ( $N = 0.4$ ).

## Section S2 Computational methods

Vienna Ab initio Simulation Package (VASP) was used to calculate the binding energy between catalysts and intermediates. The Perdew, Burke and Ernzerhof (PBE) parameterized generalized exchange-correlation interactions are implemented by the VASP package. The kinetic energy cutoff used in all calculations was 400 eV. A ( $2 \times 2 \times 1$ ) Monkhorst-Pack  $k$ -point sampling was used for all surface calculations.  $H_2O$  and  $H_2$  calculations were performed in boxes of  $15 \text{ \AA} \times 15 \text{ \AA} \times 15 \text{ \AA}$ .

## Section S3 Supplementary Figures

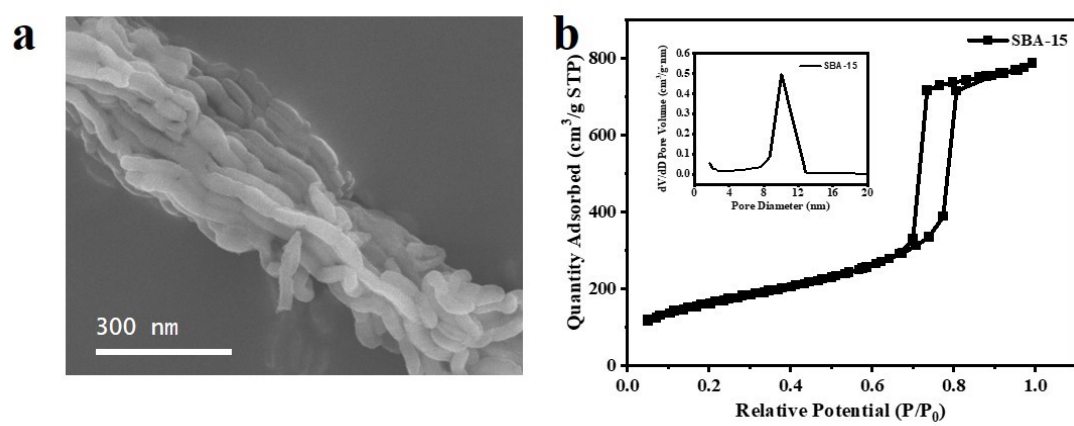

**Figure S1.** (a) SEM image and (b) BET of SBA-15.

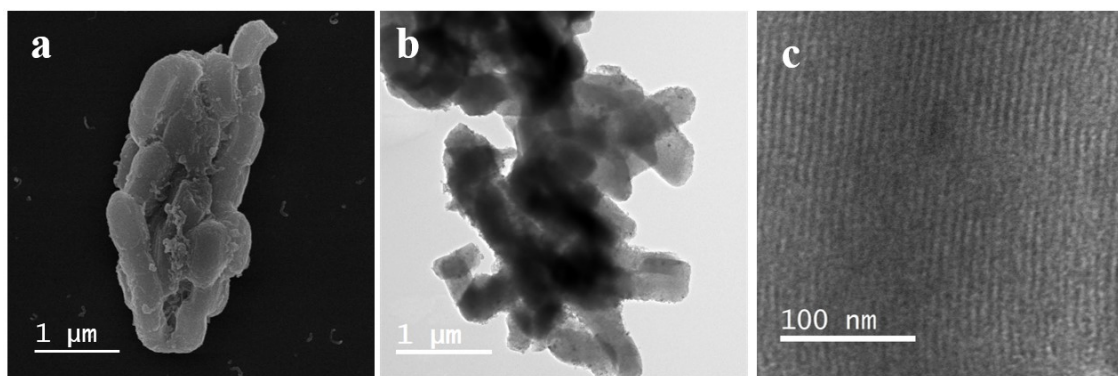

**Figure S2.** (a) SEM, (b-c) TEM images of CoFe/NC-750.

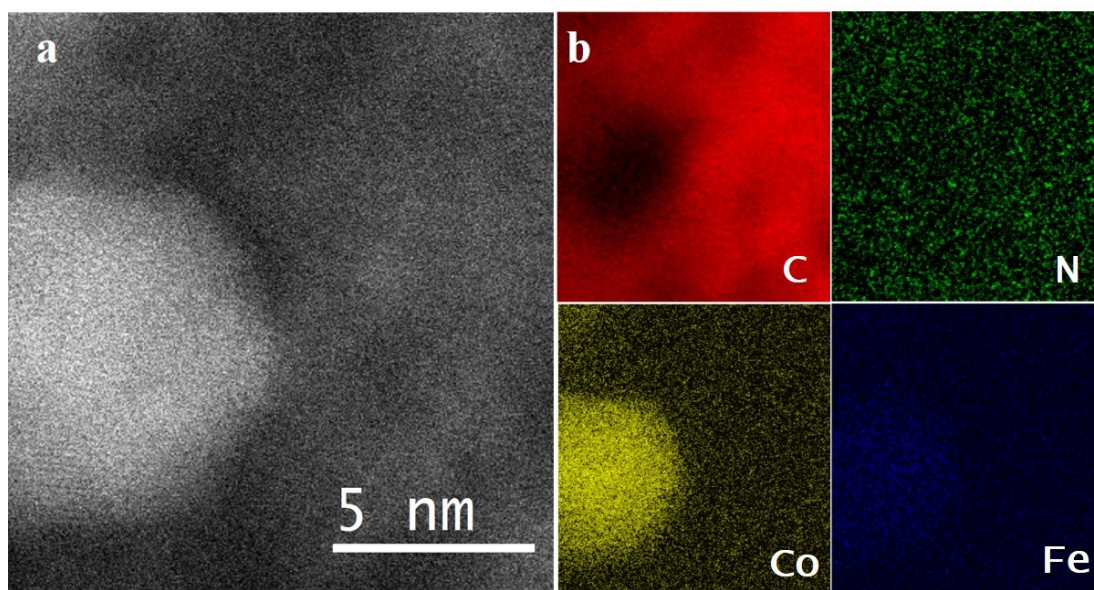

**Figure S3.** (a) HAADF image, and (b) corresponding EELS mappings of CoFe/NC-750.

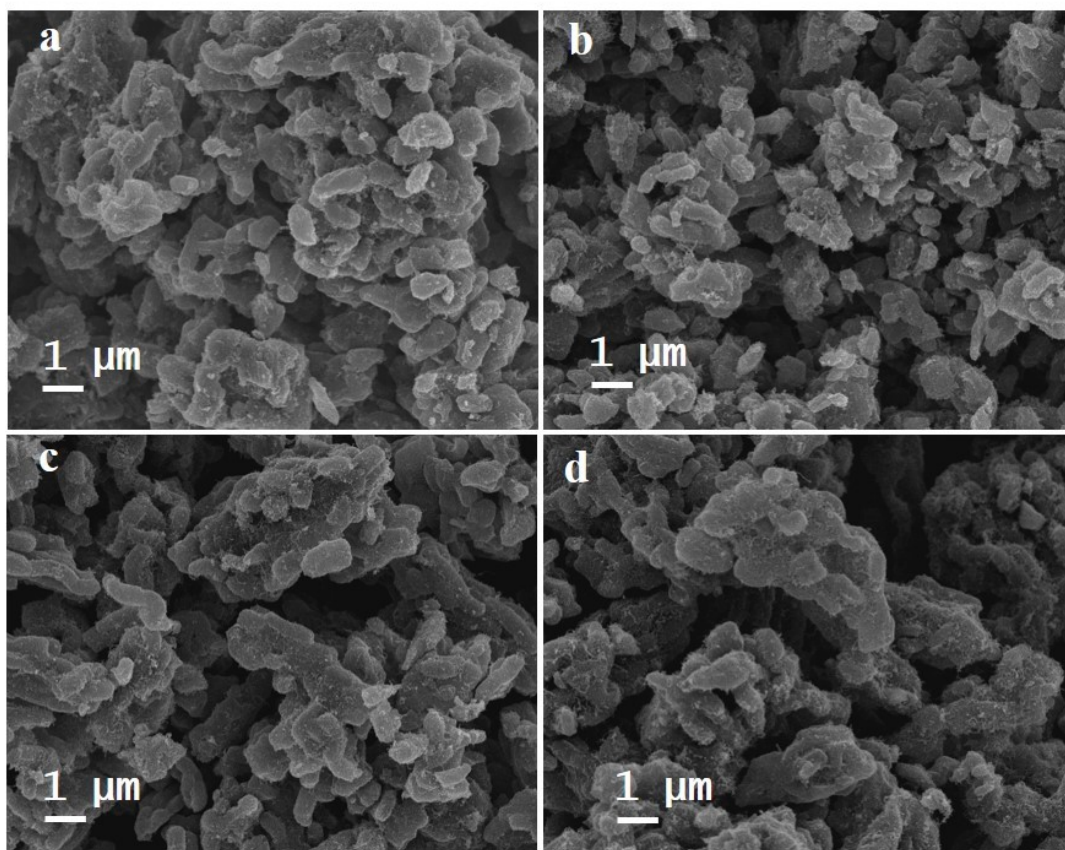

**Figure S4.** (a-d) SEM images CoFe/NC-700, CoFe/NC-750, CoFe/NC-800 and CoFe/NC-850.

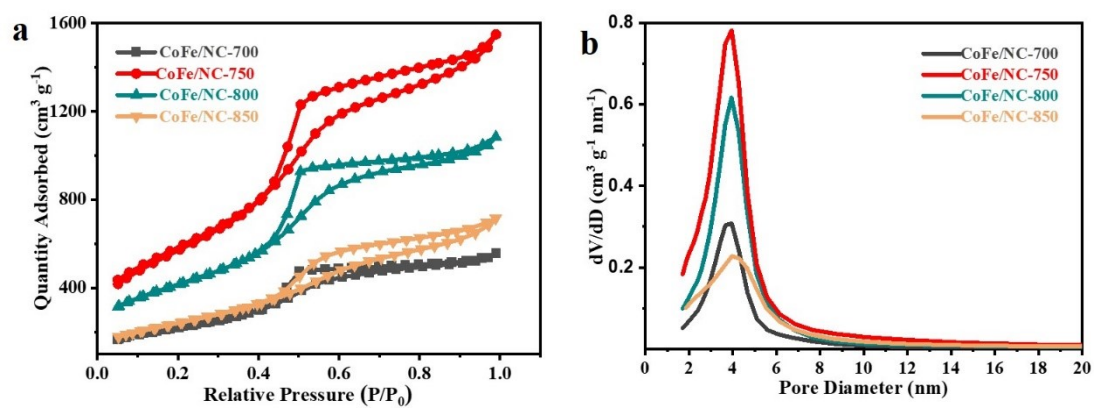

**Figure S5.** (a-b) Nitrogen adsorption/desorption isotherm of CoFe/NC-700, CoFe/NC-750, CoFe/NC-800 and CoFe/NC-850.

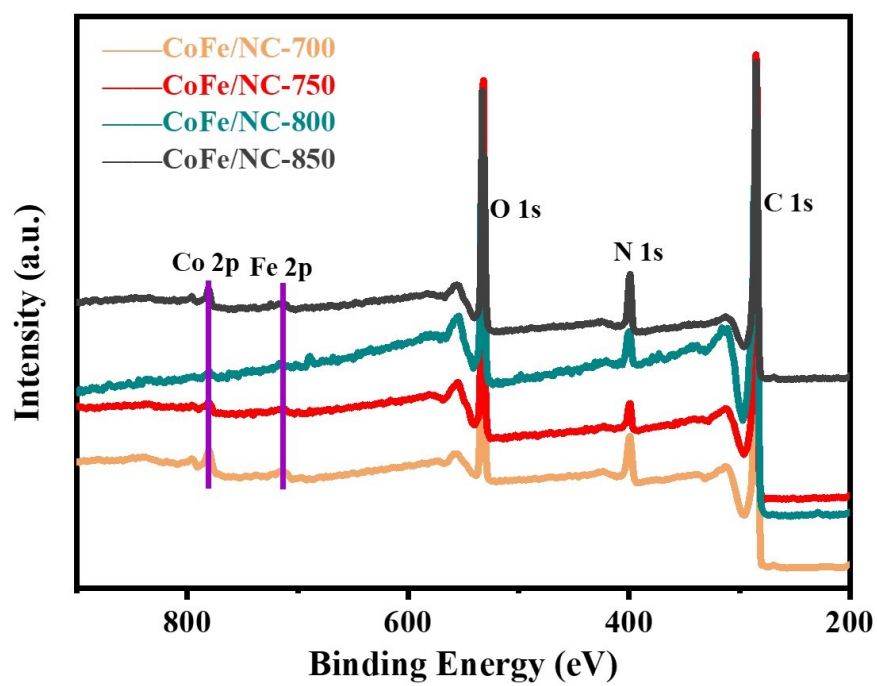

**Figure S6.** XRD patterns of CoFe/NC-700, CoFe/NC-750, CoFe/NC-800 and CoFe/NC-850.

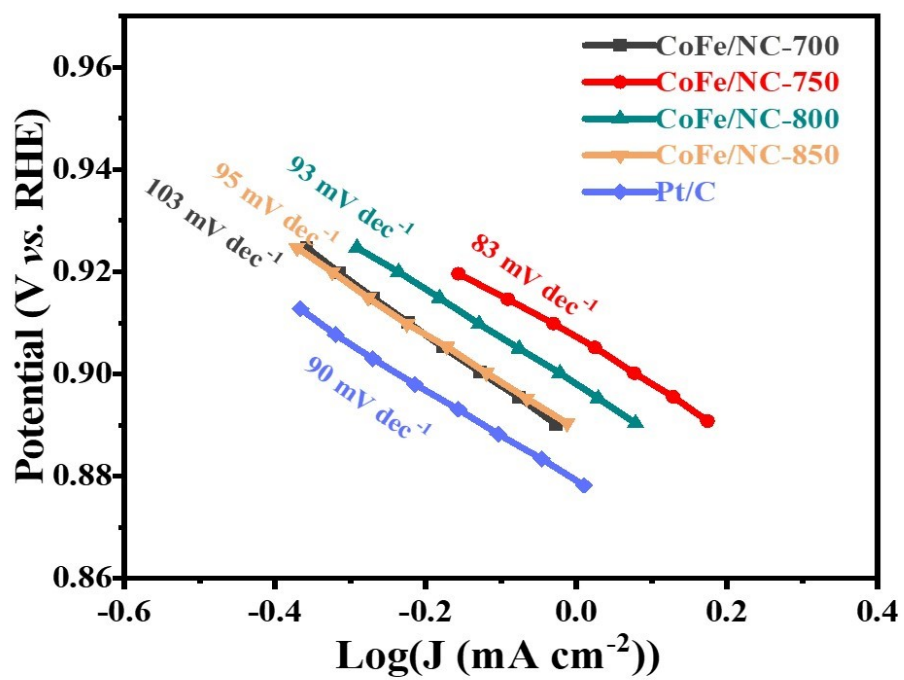

**Figure S7.** Tafel slope for CoFe/NC-700, CoFe/NC-750, CoFe/NC-800 and CoFe/NC-850.

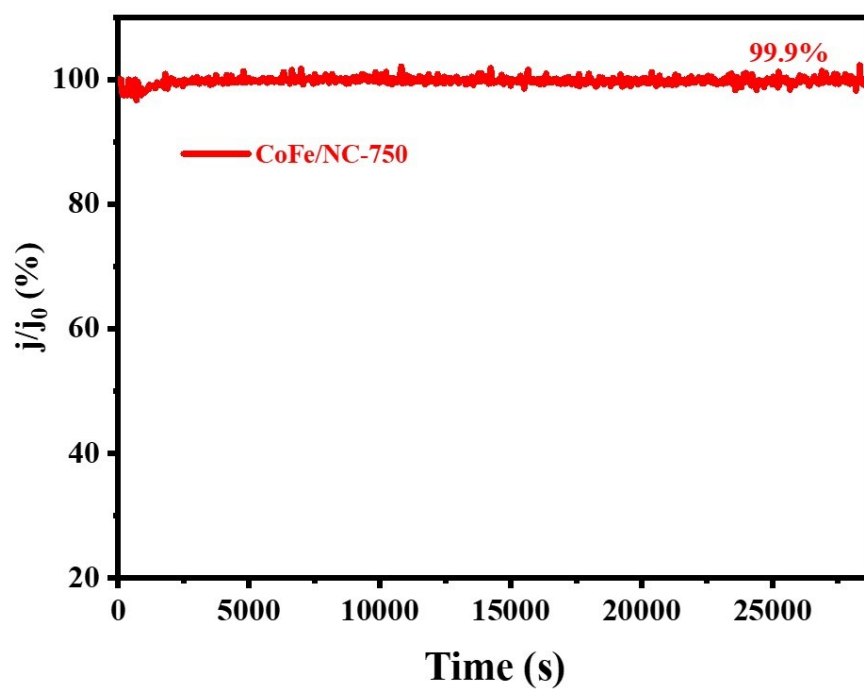

**Figure S8.** Stability result for CoFe/NC-750.

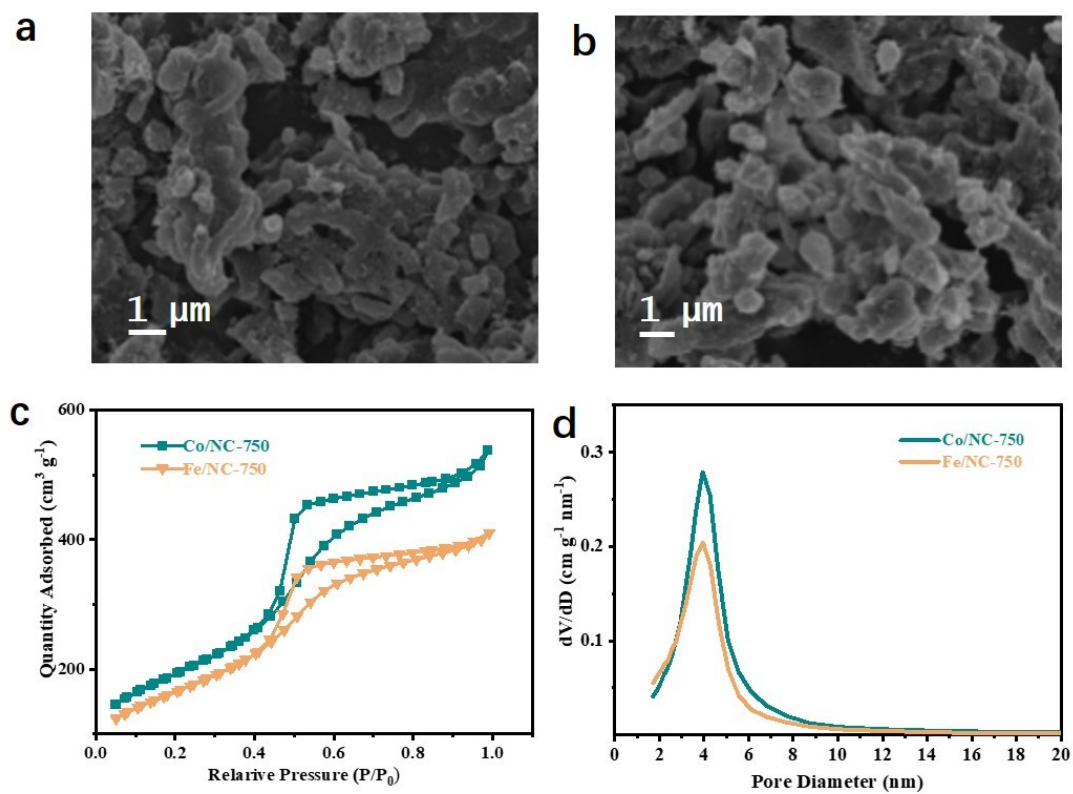

**Figure S9.** (a-b) SEM images and (c-d) BET results of Co/NC-750 and Fe/NC-750.

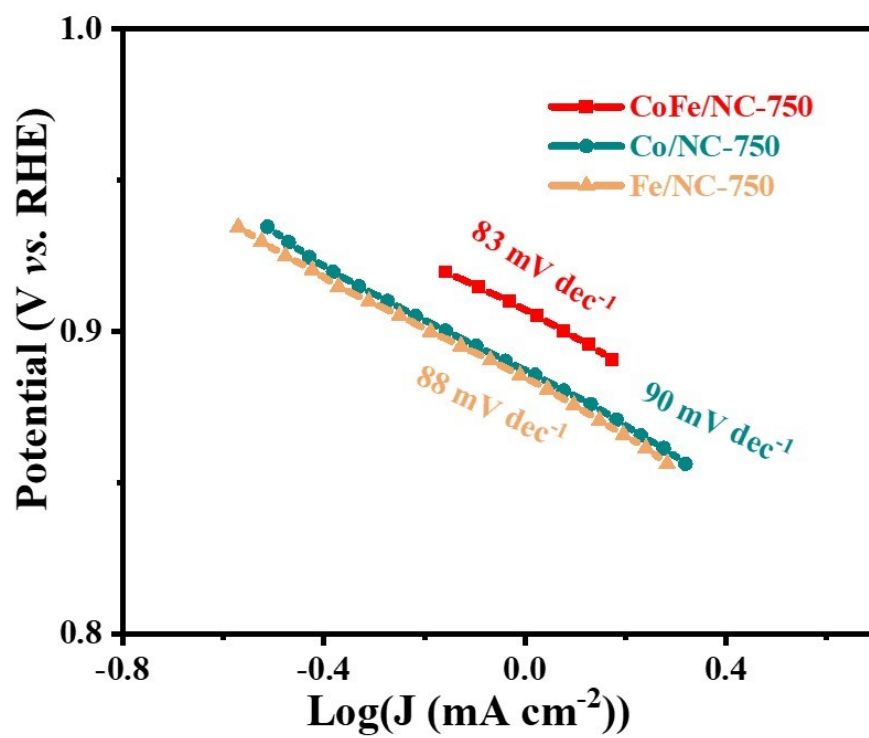

**Figure S10.** Tafel slope for CoFe/NC-750, Co/NC-750 and Fe/NC-750.

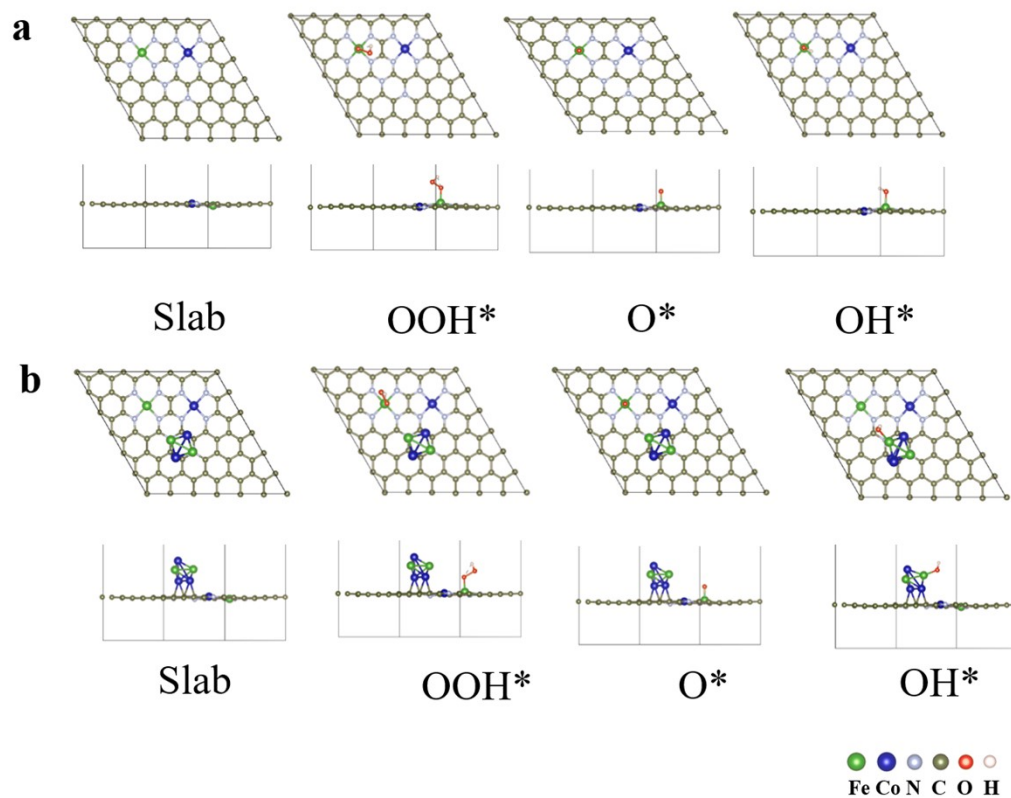

**Figure S11.** DFT calculation results (a) the reaction scheme with the intermediates in the ORR process on CoFe-dual atoms/NC, (b) the reaction scheme with the intermediates in the ORR process on CoFe/NC.

## Section S4 supplementary Table

Table S1. Comparisons of the electrocatalytic activities of the reported materials in 0.1 M KOH.

| Catalyst                                         | E <sub>onset</sub><br>(V) | E <sub>1/2</sub><br>(V) | Tafel<br>(mV/d<br>ec) | J <sub>L</sub>  <br>(mA<br>cm <sup>-2</sup> ) | J <sub>K</sub> at 0.85<br>V <sub>RHE</sub><br>(mA cm <sup>-2</sup> ) | Reference                                          |
|--------------------------------------------------|---------------------------|-------------------------|-----------------------|-----------------------------------------------|----------------------------------------------------------------------|----------------------------------------------------|
| CoFe/NC-750                                      | 1.02                      | 0.87                    | 83                    | 5.69                                          | 8.76                                                                 | This work                                          |
| SA-<br>CoCu@Cu/CoNP                              | 0.98                      | 0.88                    | 59.9                  | N/A                                           | N/A                                                                  | Adv. Energy Mater., 2021, 11, 2100303              |
| Co <sub>2</sub> P/NP-C                           | ~0.9                      | 0.81                    | 62.13                 | 4.54                                          | N/A                                                                  | Composites, Part B, 2022,23 ,109589                |
| Co-NP/MNCF                                       | N/A                       | 0.836                   | 51.9                  | 5.9                                           | N/A                                                                  | Chem. Eur. J., 2023,29, e202204034                 |
| Fe <sub>3</sub> N/Fe <sub>NP</sub> -N-C-<br>3.3% | N/A                       | 0.867                   | 63.9                  | 6.24                                          | N/A                                                                  | Carbon, 2023, 214, 118333                          |
| Fe <sub>3</sub> C@NC/rGO<br>100NP                | 0.95                      | 0.86                    | N/A                   | N/A                                           | N/A                                                                  | J. Mater. Res. Technol., 2022, 21, 1307-1315       |
| Co-N-C/CNF                                       | N/A                       | 0.859                   | 58                    | N/A                                           | N/A                                                                  | Nano Res, 2022, 16, 545-554                        |
| Fe-Nx-CNFs                                       | N/A                       | 0.875                   | 88                    | 6.08                                          | 24.5(at<br>0.8V)                                                     | Mater. Chem. Front, 2022, 6, 3213-3224             |
| FeNb <sub>2</sub> O <sub>6</sub> /NICC           | 1.09                      | 0.882                   | 87.1                  | 6.0                                           | N/A                                                                  | J Colloid Interf Sci, 2024, 661, 102-112           |
| CNT@ZnCo/NSC                                     | 0.98                      | 0.83                    | 83.2                  | ~5                                            | N/A                                                                  | Int. J. Hydrogen Energy, 2024, 51, 1229-1241       |
| CV-FeP/NPCNT-<br>30                              | 1.142                     | 0.92                    | 100                   | 5.89                                          | N/A                                                                  | Inorg. Chem. Front., 2024, DOI: 10.1039/D4QI00182F |
| FeNC-20                                          | 0.98                      | 0.889                   | 62.1                  | ~6                                            | 4.5                                                                  | Chem. Eng. J.,2023,474,145464                      |
| Fe/FexC@Fe-N-<br>C-900                           | 1.01                      | 0.91                    | 44.8                  | 5.72                                          | ~20                                                                  | Chem. Eng. J., 2023, 453, 139820                   |
